# Supplementary material for: Plant miRNA osa-miR172d-5p suppressed lung fibrosis by targeting Tab1
Source: Sci Rep. 2023 Feb 6;13:2128. doi: 10.1038/s41598-023-29188-6 (PMC9901827; doi:10.1038/s41598-023-29188-6)

# **Plant miRNA osa-miR172d-5p suppressed lung fibrosis by targeting Tab1**

**Motofumi Kumazoe<sup>1,#</sup>, Fumiyo Ogawa<sup>1,#</sup>, Ai Hikida<sup>1</sup>, Yu Shimada<sup>1</sup>, Ren Yoshitomi<sup>1</sup>,  
Ryoya Watanabe<sup>1</sup>, Hiroaki Onda<sup>1</sup>, Yoshinori Fujimura<sup>1</sup>, and Hirofumi  
Tachibana<sup>1,\*</sup>**

<sup>1</sup>Division of Applied Biological Chemistry, Department of Bioscience and Biotechnology,  
Faculty of Agriculture, Kyushu University, Fukuoka 819-0395, Japan

<sup>#</sup>Both authors contributed equally to this work.

Running title: **Antifibrotic effects of Osa-miR172d-5p through Tab1 suppression**

\*Corresponding author: Hirofumi Tachibana, 744 Motooka, Nishi-ku, Fukuoka 819-0395,  
Japan. Tel and Fax: (+81) (92) 802-4749; E-mail: [tatibana@agr.kyushu-u.ac.jp](mailto:tatibana@agr.kyushu-u.ac.jp)

**Keywords:** plant miR, Fibrosis, Bleomycin, TGF $\beta$ , Tab1

**SIFig1 The effect of osa-miR172d-5p on the viable cell number of HFL1 cells.**

HFL1 cells were treated with indicated miRs (10 nM) for 24 h, 48 h. Viable cells were assessed by ATPlite (n = 4). Data are shown as mean  $\pm$  SEM. Student's t test.

**SIFig2 The effect of osa-miR172d-5p on the expression levels of senescence-related genes and autophagy related genes of HFL1 cells.**

(A-C) HFL1 cells were treated with indicated miRs (10 nM) for 24 h, 48 h. The expression levels of (A-B) senescence-related genes and (C) autophagy related genes were assessed by qRT-PCR (n = 4). Data are shown as mean  $\pm$  SEM. Student's t test.  $^{**}P < 0.01$ .

**SIFig3 The effect of osa-miR172d-5p on the Human Pulmonary Artery Endothelial Cells.**

(A) Human Pulmonary Artery Endothelial Cells (HPAECs) were treated with indicated miRs (10 nM) for 48 h. Viable cells were assessed by ATPlite (n = 4). (B-D) HPAECs were treated with indicated miRs (10 nM) for 48 h. The expression levels of (B) TGF related gene, (C) senescence-related gene and (D) autophagy related gene were assessed by qRT-PCR (n = 4). Data are shown as mean  $\pm$  SEM. Student's t test.

**SIFig4 Osa-miR172d-5p suppressed Colla upregulation in a bleomycin-induced fibrosis model.**

C57BL male mice were treated with bleomycin (1 mg/kg bw intratracheal administration); after 1 week, the bleomycin-treated mice were treated with the negative control miR (3 nmol/mice 5 times every 2 weeks, intraperitoneal injection of AteloGene<sup>TM</sup>) or miR Osa-miR172d-5p mimic miR (3 nmol/mice five times every 2 weeks, intraperitoneal injection of AteloGene<sup>TM</sup>). After 3 weeks, the mice were sacrificed, their lung tissues were harvested, and Colla levels were assessed by western blot analysis (n = 5, 5, 4). Data are shown as mean  $\pm$  SEM. Dunnett's test.  $^{***}P < 0.001$ .

**SIFig5 Western Blot images**

Western Blot images A, B (for Fig1C), C, D (for Fig3A), E and F (for SIFig4A).

**SI Table1 Primer List**

|              |   |    |                          |    |
|--------------|---|----|--------------------------|----|
| P21 (CDKN1A) | F | 5' | TCAAATCGTCCAGCGACCTTC    | 3' |
|              | R | 5' | CATGCCCTGTCCATAGCCTCTAC  | 3' |
| IL-1B        | F | 5' | GAAGCTGATGGCCCTAAACA     | 3' |
|              | R | 5' | AAGCCCTTGCTGTAGTGGTG     | 3' |
| GLS          | F | 5' | CAGAAGGCACAGACATGGTTGG   | 3' |
|              | R | 5' | GGCAGAAACCACCATTAGCCAG   | 3' |
| IL-6         | F | 5' | CCTGAACCTTCCAAAGATGGC    | 3' |
|              | R | 5' | TTCACCAGGCAAGTCTCCTCA    | 3' |
| CHOP         | F | 5' | TGTTAAAGATGAGCGGGTGGC    | 3' |
|              | R | 5' | CTTGAACACTCTCTCCTCAGGTTC | 3' |
| ATG9B        | F | 5' | AACTGCTTCGCTCAGTCTGC     | 3' |
|              | R | 5' | AGCTCAGCTCCTCCGGG        | 3' |
| ATG16L2      | F | 5' | ACCTGCGTGTCTCAGCAACAT    | 3' |
|              | R | 5' | CAGCTTTGGTCCAGTCAGAAC    | 3' |
| BECN1        | F | 5' | GATGGTGTCTCTCGCAGATTC    | 3' |
|              | R | 5' | AGTCTTCGGCTGAGGTTCTCC    | 3' |
| ACTB         | F | 5' | ATGTGGCCGAGGACTTTGATT    | 3' |
|              | R | 5' | AGTGGGGTGGCTTTTAGGATG    | 3' |

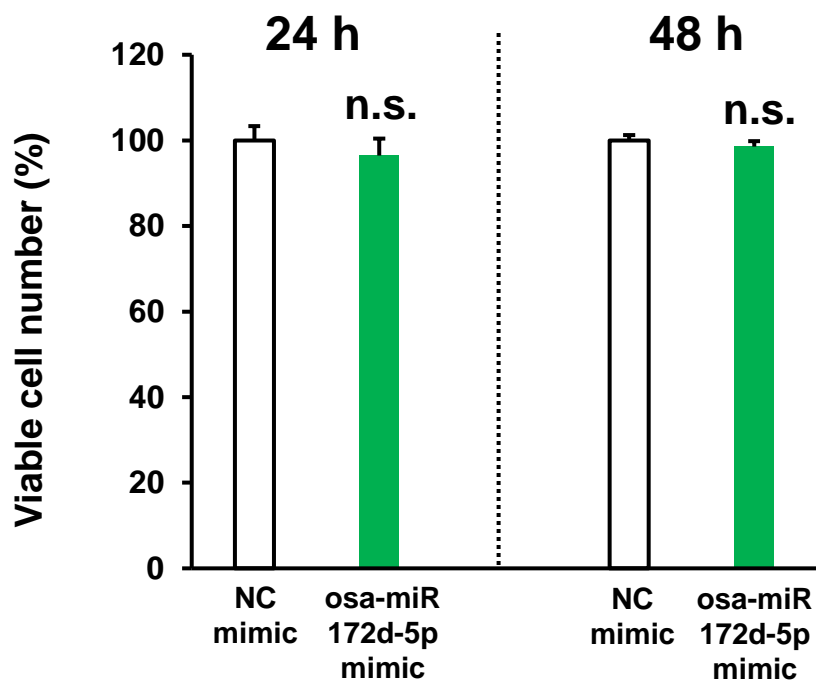

**A**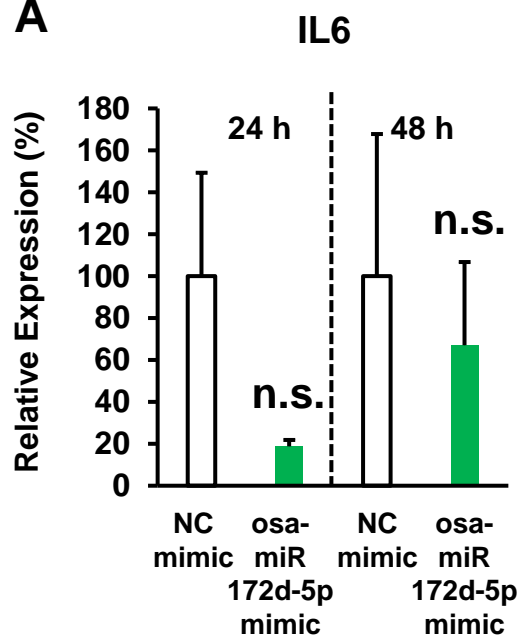**B**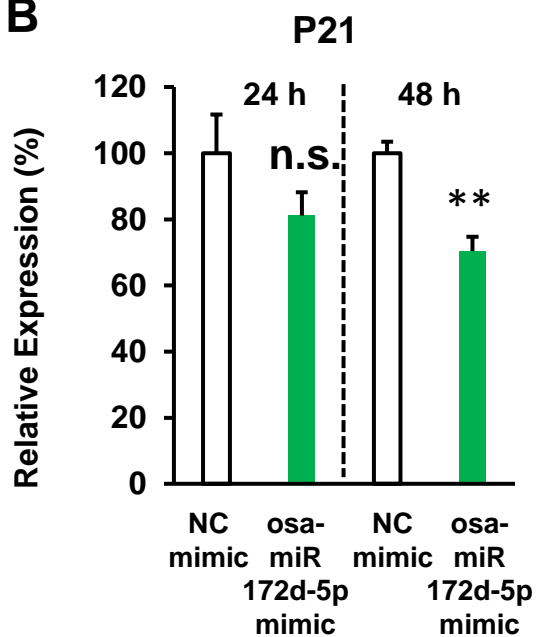**C**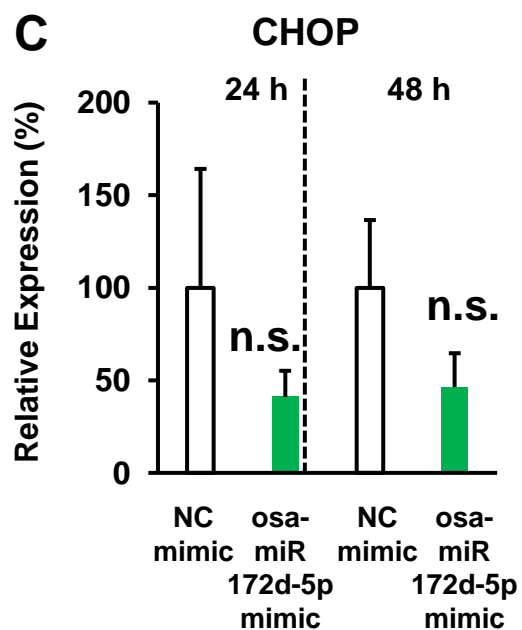

**A**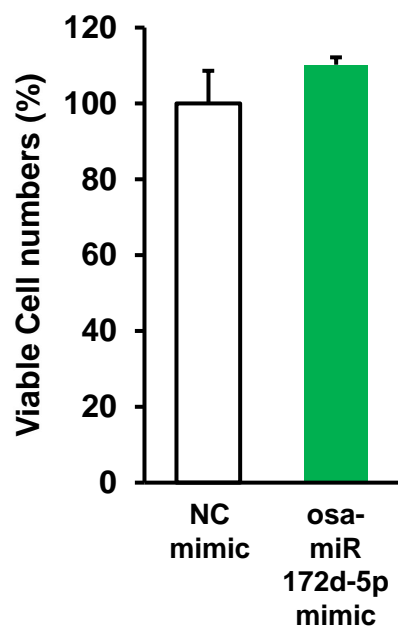**B****ASMA**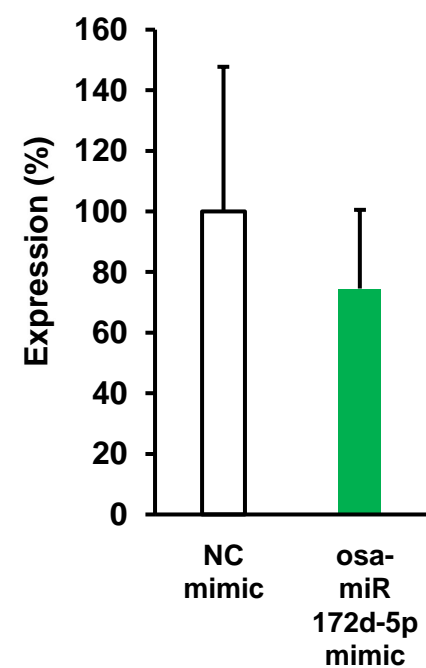**C****P21**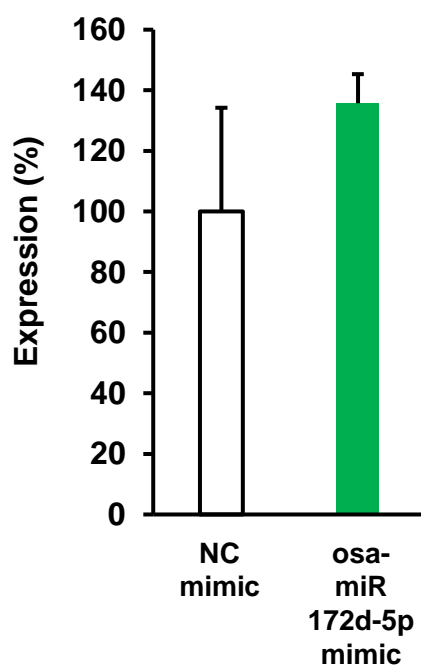**D****GLS1**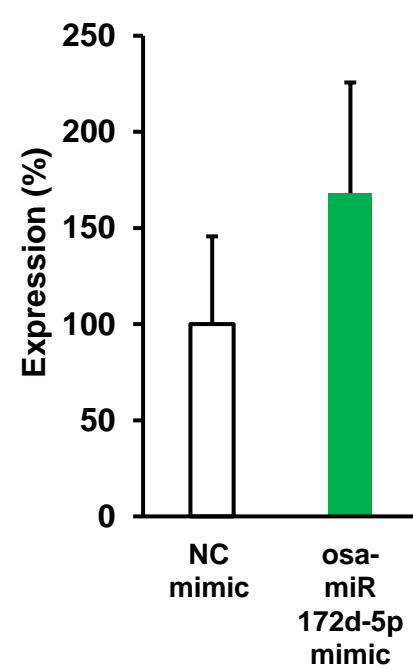

**A**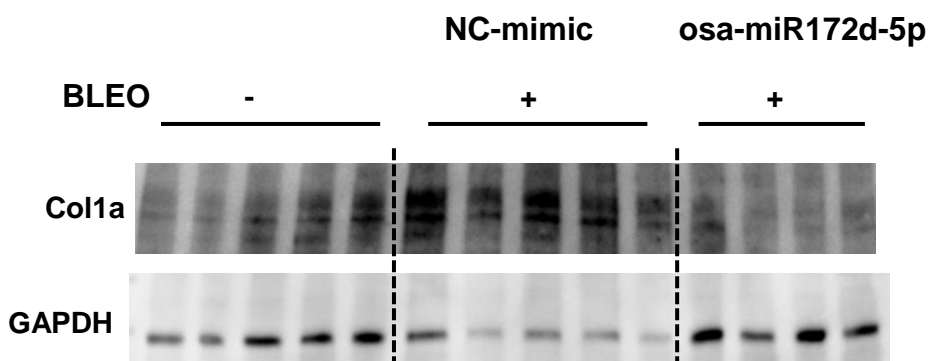**B**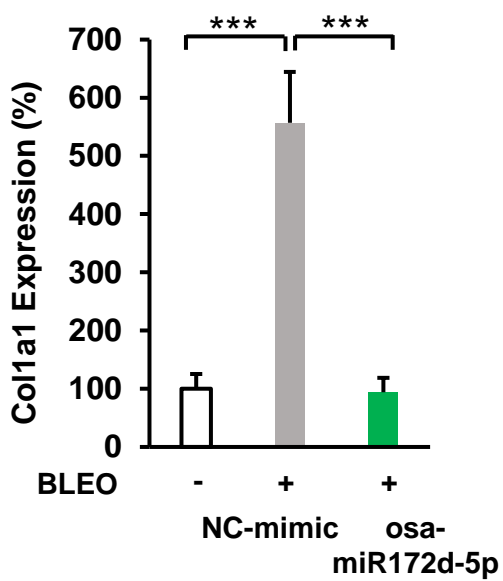

**A**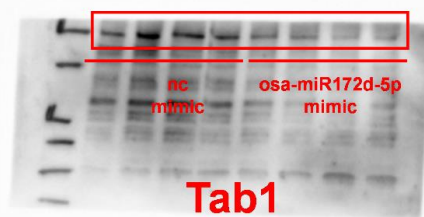**B**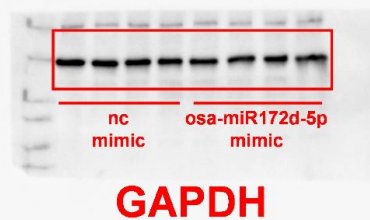**C**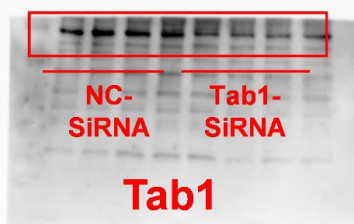**D**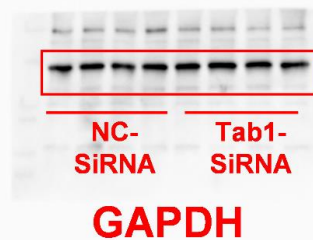**E**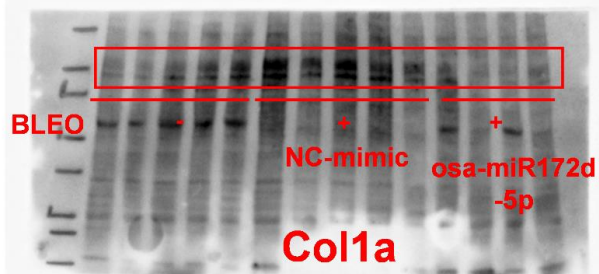**F**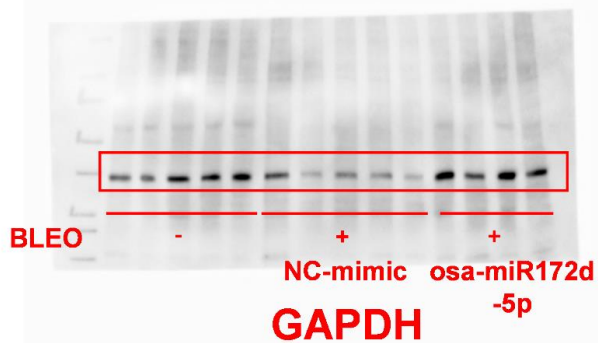

Supplement: Supplementary file 1 — Supplementary Information. [file 41598_2023_29188_MOESM1_ESM.pdf]
